# Neuroblastoma signalling models unveil combination therapies targeting feedback-mediated resistance

Mathurin Dorel<sup>1,2</sup>, Bertram Klinger<sup>1,2,5,6</sup>, Tommaso Mari<sup>8</sup>, Joern Toedling<sup>3</sup>, Eric Blanc<sup>4</sup>, Clemens Messerschmidt<sup>4</sup>, Michal Nadler-Holly<sup>8</sup>, Matthias Ziehm<sup>8</sup>, Anja Sieber<sup>1,2,5</sup>, Falk Hertwig<sup>3</sup>, Dieter Beule<sup>4</sup>, Angelika Eggert<sup>3,5,6,7</sup>, Johannes H. Schulte<sup>3,5,6,7</sup>, Matthias Selbach<sup>8</sup>, Nils Blüthgen<sup>1,2,4,6,7,\*</sup>

1. Institute of Pathology, Charité-Universitätsmedizin Berlin, Berlin, Germany
2. Integrative Research Institute for the Life Sciences and Institute for Theoretical Biology, Humboldt-Universität zu Berlin, Berlin, Germany
3. Department of Pediatric, Division of Oncology and Haematology, Charité-Universitätsmedizin Berlin, Berlin, Germany
4. Berlin Institute of Health, Berlin, Germany
5. German Cancer Consortium (DKTK), partner site Berlin, Germany
6. German Cancer Research Center (DKFZ), Heidelberg, Germany
7. Berlin Institute of Health (BIH), Berlin, Germany
8. Max Delbrück Center for Molecular Medicine, Berlin, Germany

\* Corresponding Author: Nils Blüthgen, [nils.bluthgen@charite.de](mailto:nils.bluthgen@charite.de)

Subject categories: Network Biology, Signal Transduction

Keywords: mapk, signalling, synergy, neuroblastoma

## 1 Abstract

2 Very high risk neuroblastoma is characterised by increased MAPK signalling, and targeting  
3 MAPK signalling is a promising therapeutic strategy. We used a deeply characterised panel  
4 of neuroblastoma cell lines and found that the sensitivity to MEK inhibitors varied drastically  
5 between these cell lines. By generating quantitative perturbation data and mathematical  
6 modelling, we determined potential resistance mechanisms. We found that negative feedbacks  
7 within MAPK signalling and to the IGF receptor mediate re-activation of MAPK signalling  
8 upon treatment in resistant cell lines. By using cell-line specific models, we predict that  
9 combinations of MEK inhibitors with RAF or IGFR inhibitors can overcome resistance, and  
10 tested these predictions experimentally. In addition, phospo-proteomics profiles confirm the  
11 cell-specific feedback effects and synergy of MEK and IGFR targeted treatments. Our study  
12 shows that a quantitative understanding of signalling and feedback mechanisms facilitated by  
13 models can help to develop and optimise therapeutic strategies, and our findings should be  
14 considered for the planning of future clinical trials introducing MEKi in the treatment of  
15 neuroblastoma.

## 16 Introduction

17 Neuroblastoma is the most common and devastating extracranial childhood solid tumour, accounting for  
18 15% of all childhood cancer deaths. The 5-year survival rate is 75% overall, but it is below 45% for so-called  
19 high-risk neuroblastoma that represent about 40% of patients (De Bernardi *et al*, 2003; Maris *et al*, 2007;  
20 Kyo *et al*, 2011). Telomere maintenance is a central hallmark of high-risk neuroblastoma (Peifer *et al*,  
21 2015), and approximately 50% of high-risk neuroblastoma harbour amplification of the MYCN oncogene  
22 (Barone *et al*, 2013). Mutations activating the RAS/MAPK signalling pathway are frequent in high-risk and  
23 relapsed neuroblastoma (Ackermann *et al*, 2018; Eleveld *et al*, 2015), with relapsed neuroblastoma being  
24 almost always fatal. Most recently, mutations in the p53/MDM2 or RAS/MAPK pathway in the presence of  
25 telomere maintenance mechanisms were shown to define a subgroup of ultra-high risk neuroblastoma with a  
26 5-year survival below 20%. Therefore, development of novel therapies for patients with high risk or relapsed  
27 neuroblastoma is an urgent clinical need. Mutations of anaplastic lymphoma kinase (ALK), present in 8% of  
28 all patients at diagnosis (Bresler *et al*, 2014; Hallberg and Palmer, 2016), are the most common mutations  
29 activating the RAS/MAPK pathway in neuroblastoma. In addition, mutations in PTPN11, NF1, Ras and  
30 other RAS/MAPK pathway signalling elements occur in neuroblastoma (Pugh *et al*, 2013; Eleveld *et al*,  
31 2015).

32 This makes RAS/MAPK pathway inhibition a promising treatment option for neuroblastoma, and ALK  
33 and MEK inhibitors are already being tested in early clinical trials (Johnsen *et al*, 2018). However, tumour  
34 responses to targeted inhibitors were inconsistent, and early progression pointed towards development of  
35 resistance, giving a strong incentive to understand mechanisms of primary and secondary resistance and how  
36 to overcome these mechanisms.

37 Resistance to targeted therapies of signalling pathways are often mediated by feedbacks that re-wire or re-  
38 activate signalling. For example, resistance to PI3K/mTOR inhibition in breast cancer is often mediated by  
39 feedbacks that lead to activation of JAK/STAT signalling (Britschgi *et al*, 2012). Similarly, in colon cancer,  
40 MAPK-directed therapy is counteracted by a negative feedback that leads to hyper-sensitisation of the EGF  
41 receptor and ultimately reactivation of MAPK and AKT signalling (Klinger *et al*, 2013; Prahallad *et al*,  
42 2012). Additionally, a very strong feedback from ERK to RAF leads to re-activation of MAPK signalling  
43 upon MEK inhibition in many cancer types (Friday *et al*, 2008; Fritsche-Guenther *et al*, 2011; Sturm *et al*,  
44 2010). One approach to overcome feedback-mediated resistance is by combinatorial therapy that co-targets  
45 the feedback (Klinger and Blüthgen, 2014).

46 We report here how a more quantitative understanding of feedback mechanisms might help to optimise  
47 combinatorial treatment. We used a neuroblastoma cell line panel representing the class of very high-risk  
48 neuroblastoma, which we profiled for drug sensitivity, genomic and transcriptomic alterations. We observed  
49 strong differences in the sensitivity to MEK inhibition. To arrive at a mechanistic understanding of resistance  
50 to MEK inhibition, we generated systematic perturbation data and quantified signalling using data-driven  
51 models. By this we described qualitative and quantitative differences in feedback structures that might  
52 confer the observed robustness to MEK inhibition. We then identified potential combinations capable of  
53 sensitising highly resistant cell lines to MEK inhibition, and tested these combinations systematically.

## 54 Results

### 55 Drug sensitivity in a panel of very-high-risk neuroblastoma cell lines

56 We collected a panel of 9 neuroblastoma cell lines (CHP212, LAN6, NBEB1, SKNAS, NGP, SKNSH,  
57 N206, KELLY and IMR32) and performed molecular profiling of these cells (RNA-sequencing and exome  
58 sequencing, see Figure 1A). We noticed that all cell lines harbour a mutation in at least one of the RAS  
59 pathway genes with all cell lines having a mutation in either KRAS, NRAS, NF1, BRAF or ALK. One cell line  
60 (IMR32) had two mutations in the pathway: a mutation in KRAS and an atypical BRAF mutation. Most  
61 cell lines also have a mutation in one of the p53 pathway genes: ATRX, ATM, ATR, PRKDC, CDKN2A  
62 and TP53. Additionally, all express telomerase as seen by TERT expression, except for LAN6 which is  
63 known to have an alternative mechanism to lengthen the telomeres (ALT) (Peifer *et al*, 2015). We saw  
64 strong variability in the expression of MYCN, with 4 cell lines expressing low levels of MYCN, and 5 cell  
65 lines displaying high levels of MYCN. When considering mutations of individual genes, we found a strong

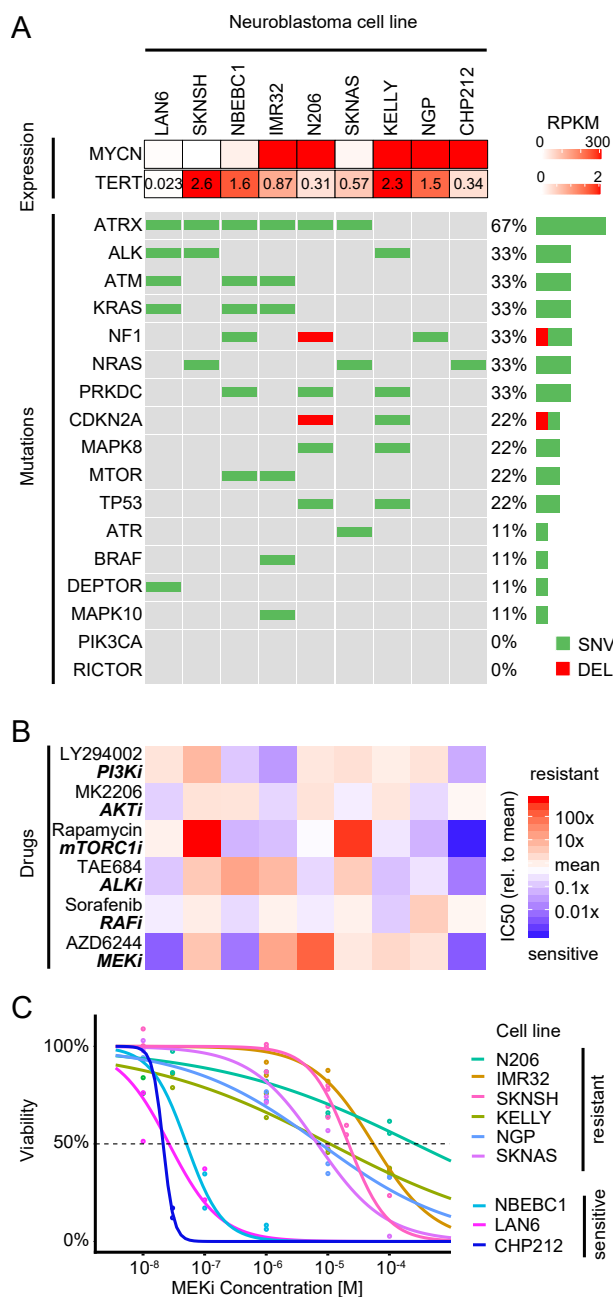

Figure 1: *Mutations are insufficient to explain sensitivity variations to RAS/PI3K drugs in neuroblastoma cell line panel A.* Oncoprint of 9 neuroblastoma cell lines for RAS/p53/PI3K related genes along with MYCN and TERT mRNA expression. **B.** Relative IC50 of the same 9 neuroblastoma cell lines as in A for drugs targeting the PI3K and MAPK pathways (n=2). **C.** Viability concentration curves for the MEK inhibitor AZD6244 on the neuroblastoma cell line panel along with the calculated IC50 (intersection with dotted line). Points represent measurements (n=2).

66 heterogeneity within our panel, but overall the frequency of mutations in individual genes reflects that of  
 67 high risk tumours (Ackermann *et al*, 2018). Taken together, those data indicate that the chosen cell line  
 68 panel can be seen as representative for the group of very-high risk neuroblastoma.

69 To further characterise the cell line panel, we measured drug sensitivity for 6 inhibitors that target  
 70 components of the pathways shown to be affected by mutations (MAPK/PI3K/mTOR), using live cell

71 imaging and computing growth rates from confluency measurements (Figure 1B) In this panel of cell lines,  
72 there was no notable difference in the sensitivity to the AKT inhibitor MK2206 or to the RAF/pan-tyrosine  
73 kinase-inhibitor Sorafenib. In contrast, pronounced variation in IC<sub>50</sub> across the panel can be seen for  
74 mTORC1 inhibitor Rapamycin and MEK inhibitor AZD6244. When comparing to published drug sensitivity  
75 data, the IC<sub>50</sub> for AZD6244 largely correlate with those derived for a different MEK inhibitor (binimetinib)  
76 (Woodfield *et al*, 2016). All 6 NRAS wild type cell lines showed similar sensitivity to Rapamycin while the  
77 3 NRAS mutant cell lines exhibited either strong resistance (SKNSH and SKNAS) or sensitivity (CHP212).  
78 This is only partly in agreement with previous literature that described CHP212 but also SKNAS as sensitive  
79 to sub-nanomolar concentrations of Everolimus, a Rapamycin analog (Kiessling *et al*, 2016). AZD6244 is  
80 the drug with the most variable drug response, with a subset of 6 cell lines cell lines being very resistant  
81 to AZD6244 (IC<sub>50</sub> >10 $\mu$ M, Figure 1C, Supplementary Figure 1) and another subset of 3 cell lines showing  
82 extreme sensitivity (IC<sub>50</sub>  $\approx$  10-100 nM). When correlating inhibitor sensitivity with mutations, we found  
83 no notable correlation for AZD6244 and Rapamycin (Supplementary Figure 2). Drug sensitivities also did  
84 not correlate significantly with selected expression data (adjusted  $p > 0.93$  for the 1000 most variable genes  
85 and adjusted  $p > 0.94$  for GO signal transduction genes, Supplementary Figure 3). Also a PCA analysis  
86 could not separate cells according to MEKi sensitivity for those two expression groups (Supplementary  
87 Figure 4 and 5). For instance, previous reports showed that NF1 expression is linked to sensitivity to  
88 MEK inhibitors (Woodfield *et al*, 2016), however we only found a weak and non-significant correlation with  
89 AZD6244 sensitivity ( $R^2 = 0.34, p = 0.10$ , Supplementary Figure 6). Taken together, this data establishes  
90 that this cell line panel represents a heterogeneous group of very high risk neuroblastoma that differ in drug  
91 sensitivity, most prominently against MEK inhibitors. Furthermore, it suggests that the difference cannot  
92 be explained by single mutations or expression of marker genes alone.

### 93 **Perturbation-response data unveils heterogeneity in signalling**

94 To get insights into the underlying mechanisms of resistance to the MEK inhibitor AZD6244, we selected 6  
95 neuroblastoma cells lines that represented the spectrum of sensitivity to MEK inhibition (sensitive: CHP212,  
96 LAN6; resistant: SKNAS, SKNSH, KELLY and IMR32) Using these cell lines, we performed perturbation  
97 experiments, in which we stimulated the cells by growth factors for 30 minutes, and additionally inhibited  
98 specific pathways for 90 minutes (Figure 2A). After perturbation, we then monitored pathway activity by  
99 measuring phospho-proteins.

100 We designed the experiments such that they probe the AKT/mTOR and MAPK signalling pathways  
101 (Figure 2B). Specifically, we selected ligands that might activate those pathways based on the expression of  
102 growth factor receptors in the cell lines. As expression of receptors was heterogeneous (Supplementary Figure  
103 7 and 8), we chose a set of growth factors such that each cell line had robust expression of receptors for at least  
104 two provided ligands. Inhibitors were chosen such that they block key steps of the pathway. The position  
105 of perturbations and readouts in the signalling network is shown in Figure 2B. We perturbed the 6 cell lines  
106 with 4 ligands (PDGF, EGF, IGF1 and NGF, shown in blue) and 7 inhibitors (GS4997 (ASK1i), MK2206  
107 (AKTi), Rapamycin (mTORC1i), AZD6244/Selumetinib (MEKi), Sorafenib (RAFi), TAE684 (ALKi) and  
108 GDC0941 (PI3Ki), shown in red) alone or in combinations. Subsequently, we measured 6 phosphoproteins  
109 (MEK, ERK, AKT, S6K, p38 and cJUN, yellow background) for each perturbation using a sandwich ELISA  
110 where a first bead-bound antibody captures the protein and a second recognises the phosphosite of interest.  
111 All experiments were performed in two biological replicates.

112 Overall, the perturbation experiments yielded 240 data points per cell line, which are visualised in a  
113 heatmap in Figure 2C. Inspection of the heatmap shows that the perturbation-response data has similar  
114 patterns in different cell lines, but there are also clear differences. For instance, inhibition of mTOR leads to  
115 down-regulation of phospho-S6K across all cell lines, but inhibition of AKT and PI3K has diverging effects  
116 on S6K. Similarly, application of MEKi leads to an increase of phospho-MEK across all cell lines, but ALK  
117 inhibition had varying effects in different cell lines.

118 To get further insights into this high-dimensional data set, we performed principal component analysis  
119 (PCA) on the perturbation data (Figure 2D top, Supplementary Figure 9). The PCA highlights 3 groups of  
120 cell lines. The first component (42% of variance) separates the cell lines according to the effect of Sorafenib  
121 and TAE684 on AKT and S6K. The second component (26%) separates IMR32 and KELLY based mainly  
122 on the MEK response to MEK inhibition. The third component (18%) contains the effects of IGF1, GS4997

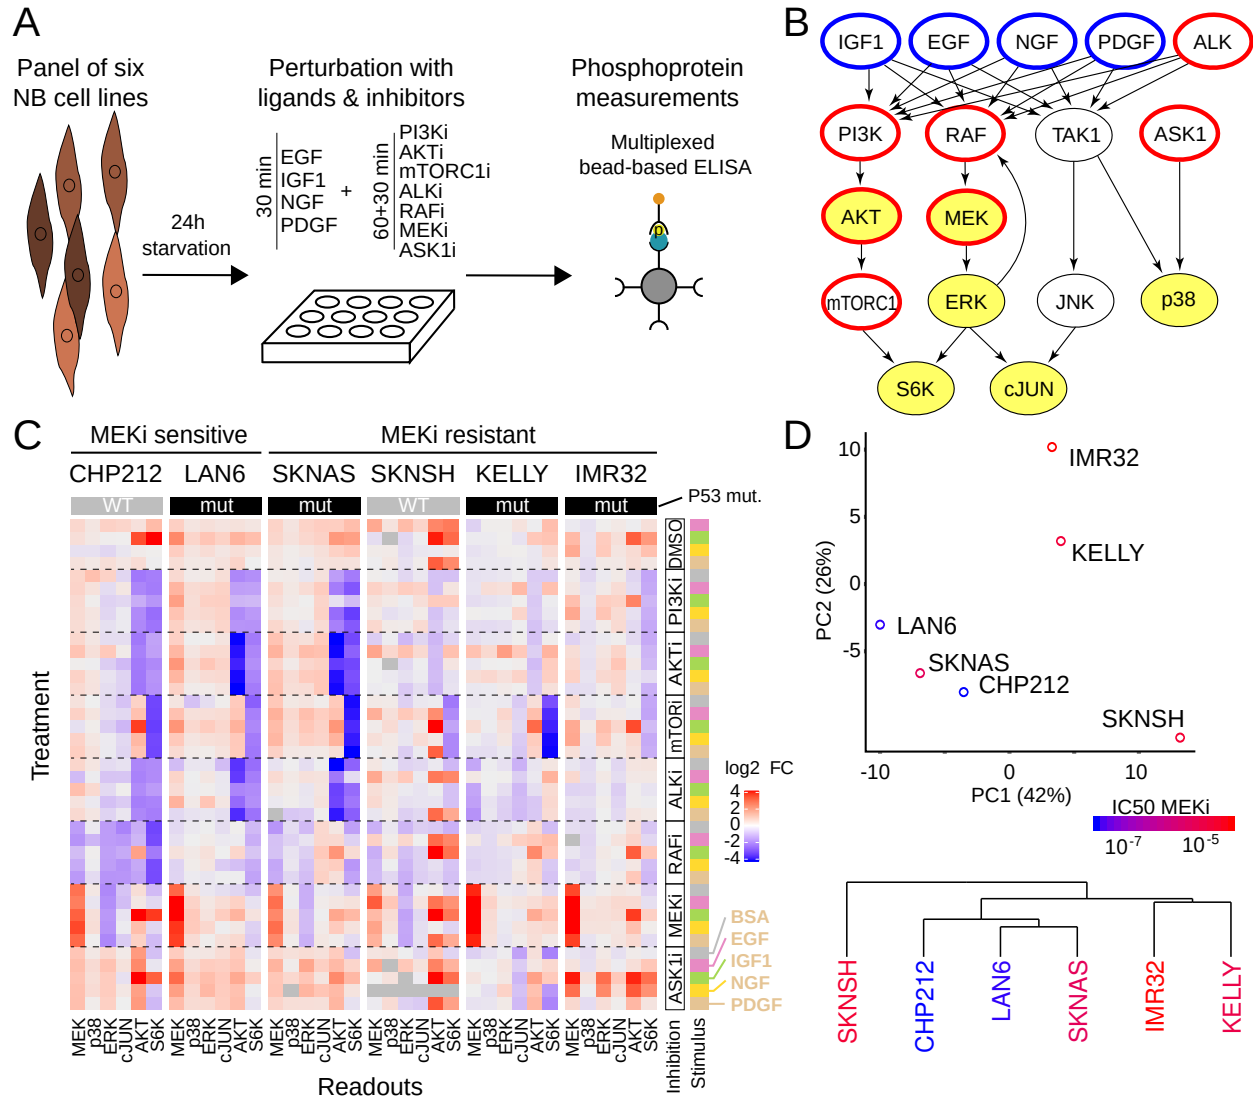

Figure 2: *Neuroblastoma cell lines show heterogeneous responses to signalling perturbations* **A.** Outline of the perturbation experiments. A panel of cell lines was treated with growth factors and small molecule inhibitors, and the resulting effect on selected phosphoproteins was measured using multiplexed bead-based ELISAs. **B.** Graphical representation of the perturbation scheme on a literature signalling network. Blue and red contour highlights ligand stimulation and kinase inhibition, respectively; yellow filling shows measured phosphoproteins. **C.** Perturbation data obtained from applying all combinations of 4 ligands or BSA control and 7 inhibitors or DMSO control to 6 neuroblastoma cell lines. Each measurement is normalised by the BSA+DMSO control of the corresponding cell line and represents at least 2 biological replicates. Readouts are phospho-proteins p-MEK1<sup>S217/S221</sup>, p-p38<sup>T180/Y182</sup>, p-ERK1<sup>T202/Y204</sup>, p-cJUN<sup>S63</sup>, p-AKT<sup>S473</sup> and p-S6K<sup>T389</sup>. **D.** Global non-mechanistic analysis of the perturbation data presented in C: TOP first two components of a principal component analysis and BOTTOM hierarchical clustering. Colour scale corresponds to the IC<sub>50</sub> for AZD6244 treatment (see also Figure 1C).

123 and Rapamycin on AKT and S6K and mainly separates KELLY and IMR32 (Supplementary Figure 10 and  
124 Supplementary Table 1)

125 When we applied hierarchical clustering on the cell line panel, SKNSH was clustered separately, suggesting  
126 that it has a very atypical response to the perturbations, with a generally very high response to all ligands,  
127 and an especially strong response to PDGF (Figure 2D bottom). This atypical status of SKNSH is also

128 present in the mRNA expression, with a PCA on the most variables genes or on the genes in the GO  
 129 term "signal transduction" separating it from the other cell lines. Interestingly, CHP212 also separated  
 130 from the other cell line in a PCA based on gene expression data, but not when considering the response to  
 131 the perturbations. When grouping cells by MEK inhibitor sensitivity, we noticed that simple multivariate  
 132 analysis by PCA does not separate cells into groups that correspond to sensitive or resistant cells (Figure 2D  
 133 top and Supplementary figure 9), and also hierarchical clustering does not separate sensitive from resistance  
 134 cell lines (Figure 2D bottom).

### 135 Signalling models highlight differential feedback regulation of MEK

136 To get further, more mechanistic, insights into potential resistance mechanisms, we used the perturbation  
 137 data to parameterise signalling models. We applied our previously developed method that has been derived  
 138 from Modular Response Analysis (MRA, implemented as R package STASNet, Dorel *et al* (2018)) to fit

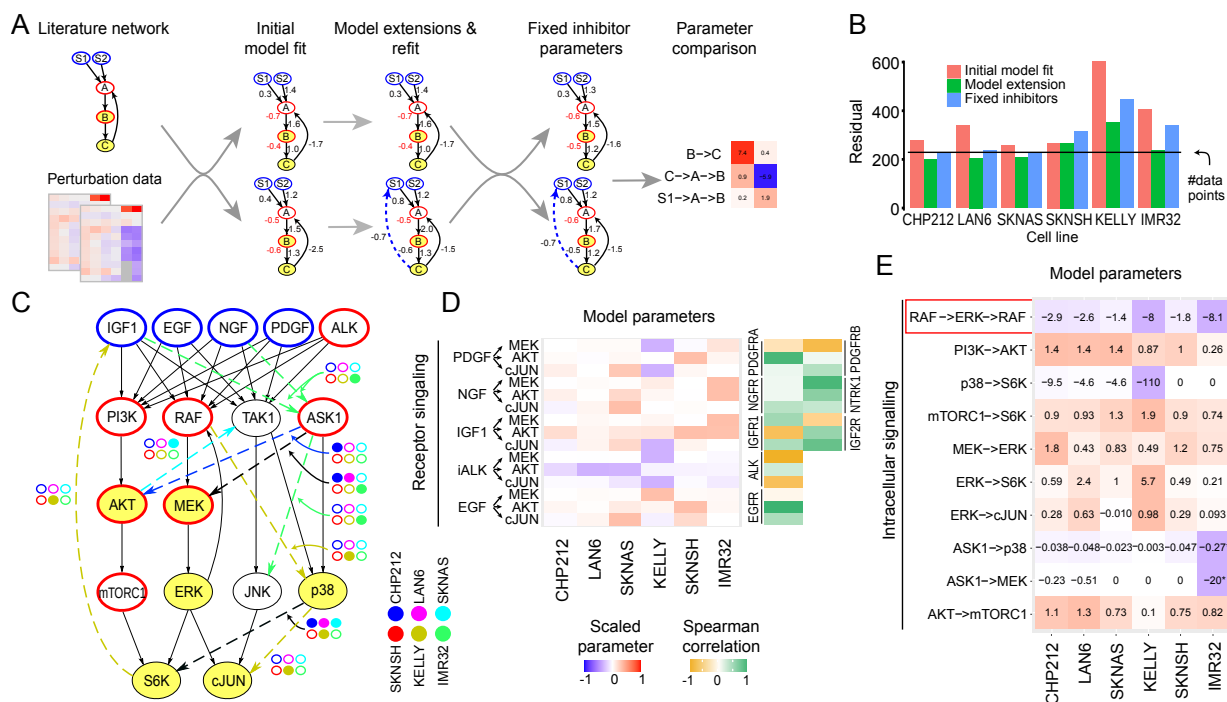

Figure 3: *Receptor expression and topology variations explain the heterogeneity in perturbation response*  
**A.** Starting from a literature-derived network, a model was fitted for each cell line (Initial model fit) and extended following suggestions from the model (Model extensions and refit). Those models with different network structures were then harmonised by fixing the inhibition parameters to a consensus value (Fixed inhibitor parameters) to make the parameters directly comparable (Parameter comparison). **B.** Model residuals before and after model extension and harmonisation. The black line represents the number of data points, which is equal to the expected mean of the error if the model explains all the data. **C.** Cell-line-specific network extensions (dashed arrows) relative to the literature network. Colour of the extended link was matched to cell line colour if required in only one cell line model and black otherwise. **D.** Model paths from the receptors to the first measured downstream node and correlation with the corresponding receptor expression. The colours correspond to the value of the path scaled by the maximum absolute value of that path between all cell lines. **E.** Model paths between non-receptor perturbed nodes and measured nodes for routes present in at least 2 cell lines. Colour scale is the same as in D. Cells are ordered from left to right from most sensitive to most resistant to the MEK inhibitor AZD6244. Due to the absence of ASK1 basal activity in IMR32 ASK1->p38 and ASK1->MEK represent in this cell line NGF->ASK1->p38 and NGF->ASK1->MEK respectively.

139 signalling network models to each cell line. This modelling procedure requires a literature network and the  
140 perturbation data as input, and then estimates response coefficients corresponding to link strengths using a  
141 maximum likelihood estimate (see Figure 3A, first step). By using the statistical framework of the likelihood  
142 ratio test, the modelling procedure then allows to test if any extension of the literature network is required  
143 to describe the data (see Figure 3A, second step). To compare parameters between cell lines, it is essential  
144 to harmonise parameters between all cells that can practically not be identified alone, i.e. parameters for  
145 inhibitors (see Figure 3A, third step). This finally yields a parameter map that allows to compare signalling  
146 strength between cell lines (see Figure 3A, final step).

147 When starting with a canonical literature network (see Materials and Methods), we obtained reason-  
148 able fits for 4 of the 6 cell lines, as judged by the sum of weighted squared residuals that is in the  
149 order of number of data points (Figure 3B, red bars), and the normal distribution of residuals (Sup-  
150 plementary Figure 11). When we systematically tested if extensions of the network improve the fit us-  
151 ing a likelihood ratio test, we found that significant improvements were still possible for most cell lines.  
152 We therefore performed successive rounds of extensions for each cell line independently (Figure 3A and  
153 *Supp\_data\_fig3\_perturbation\_data.zip*). While SKNSH required no extension of the literature network,  
154 CHP212, LAN6, SKNAS required two or three extensions. KELLY and IMR32, the two cell lines that  
155 initially had the poorest fit, required four extensions (Figure 3 C). After the extension the sum of weighted  
156 squared residuals was in the order of the number of data points for all cell lines except KELLY (Figure 3B  
157 green bar). The high residuals still exhibited by KELLY could be narrowed down to uncertainties in individ-  
158 ual data points (see *Supp\_data\_fig3\_perturbation\_data.zip*). Two network extensions (ASK1→MEK and  
159 p38→S6K) were significant in at least 3 cell lines and correspond to an effect of the ASK1 inhibitor GS4997  
160 on the MEK/ERK MAPK pathway and S6K. Both links are negative which suggests an antagonism between  
161 the p38 MAPK and the MEK/ERK MAPK pathways in neuroblastoma cell lines. This negative crosstalk  
162 from p38 to MEK/ERK has also been described in other cell systems, e.g. after p38 knockdown in HeLa  
163 cells (Finch *et al*, 2012).

164 All extended models had similar, but different, parameters for the inhibitor strength. However, there is  
165 a strong interdependence of the inhibitor strength and link strength downstream of the inhibitor which render  
166 comparison between those link strengths in different cells difficult (see *Supp\_data\_fig3\_perturbation\_data.zip*).  
167 As all cell lines received the same inhibitor concentration we therefore harmonised the inhibitor parameters  
168 by fixing them to the mean value between all models (Figure 3A, fixed inhibitor parameters). The resulting  
169 harmonised models maintained a good agreement with the data (Figure 3B, blue bars) and were used for  
170 inter-model comparisons (Figure 3D and E).

171 When inspecting the parameters for ligand-induced pathway activation, we noticed that they reflected  
172 a strong heterogeneity in ligand response between the cell lines. Reassuringly, they matched the expression  
173 of the corresponding receptors in many cases (Figure 3D, Supplementary Figure 12). The parameters for  
174 pathways downstream of NGF correlated mostly with NTRK1 expression and not with NGFR expression,  
175 which might indicate that NGF signalling is mediated mostly via NTRK1 in those cell lines. The parameters  
176 for IGF-induced signals correlated with IGF1R or IGF2R for MEK and AKT, respectively, indicating that  
177 both receptors mediate IGF1 signalling independently. Interestingly, the parameters for the pathway from  
178 EGF to MEK did not correlate with EGFR expression, but they do for EGF to AKT, which might suggest  
179 that differences in adaptor protein expression shape routing into downstream signalling in the various cell  
180 lines. Indeed, the expressions of GAB2 and SRC are very different between the cell lines and could explain  
181 that IMR32 and LAN6 are activated by EGF as strongly as SKNAS and SKNSH despite their lower EGFR  
182 expression (Figure 2C, Supplementary Figure 6). Another potential cause for the attenuated activation of  
183 MEK/ERK is that in NRAS mutant cell lines (CHP212, SKNAS and SKNSH), MEK/ERK activity is less  
184 inducible by receptors, as also parameter values of the routes from PDGF, EGF, NGF and IGF into MAPK  
185 signalling are lower in those cell lines. Conversely, these cell line models display a slightly more inducible  
186 PI3K pathway. This observation is in agreement with a recent comparative study of G12V-mutated RAS  
187 isoforms in colorectal SW48 cells, where the NRAS mutated cell line showed a weaker coupling of receptors  
188 to MEK and a stronger coupling to PI3K than in the parental cell line (Hood *et al*, 2019). This would  
189 suggest that an activation of the MEK/ERK pathway is relayed predominantly by NRAS while the PI3K  
190 pathway activation is mediated by other proteins (Yang *et al*, 2012). Taken together, this shows that the  
191 wiring and routing of ligand induced signalling in these cell lines is varying and is mostly explainable by the  
192 expression of the corresponding receptor and RAS mutation status.

193 In contrast to the receptor-associated parameters, the strength of intra-cellular kinase paths are less  
194 variable, and most paths are comparable between cell lines (Figure 3E). The most prominent exception  
195 is the negative feedback in MAPK signalling from ERK to RAF. When compared to the other cell lines,  
196 this feedback appears to be 3 to 4 times stronger in KELLY and IMR32, which are two cell lines that are  
197 highly resistant to AZD6244. A strong RAF-mediated feedback is a known resistance mechanism against  
198 MEK inhibitors (Friday *et al*, 2008; Fritsche-Guenther *et al*, 2011), where relieve of inhibition of upstream  
199 components post inhibition can partially reactivate signalling. This suggests that AZD6244 resistance could  
200 be mediated by a differential regulation of this feedback.

201 Apart from the RAF-mediated feedback, MAPK signalling is also controlled by receptor-mediated feed-  
202 backs. In the KELLY cell line, our modelling procedure extended the model by a negative feedback from S6K  
203 to IGFR that could then explain the strong accumulation of pMEK by IGF following AZD6244 treatment  
204 (Figure 3C and *Supp\_data\_fig3\_perturbation\_data.zip*). Receptor-mediated feedbacks are also known to  
205 mediate resistance, notably to MAPK inhibitions (Corcoran *et al*, 2012; Klinger *et al*, 2013; Klinger and  
206 Blüthgen, 2014; Rozengurt *et al*, 2014; Lake *et al*, 2016), by reactivating the pathway and other parallel  
207 pathways.

208 In summary, the signalling parameters derived from the perturbation data by our models show that cell  
209 lines diverge in receptor expression and feedback regulation, with strong multi-layered feedbacks for some of  
210 the resistant cell lines.

## 211 Differential quantitative wiring of resistant cell lines

212 A hallmark of negative feedbacks is that they lead to re-activation of the pathway after pathway inhibition. In  
213 agreement with this, we observe an increase of phosphorylated MEK upon MEKi treatment (AZD6244) that  
214 is more pronounced in the cell lines IMR32 and KELLY compared to the other cell lines modelled, including  
215 the most sensitive cell lines CHP212 and LAN6 (Figure 4A, Supplementary Figure 13). We also tested  
216 the most resistant cell line in our panel, N206, which also showed a strong feedback response (Figure 4A).  
217 To more precisely dissect the feedback wiring, we generated additional focused perturbation data for those  
218 cells with high feedback (KELLY, IMR32 and N206) to MEK inhibition. We stimulated cells with different  
219 growth factors (IGF and NGF or EGF), and blocked MAPK signalling with MEK and RAF inhibitors, and  
220 subsequently monitored six phosphoproteins (Figure 4B). Subsequently, we used this data to parameterise a  
221 focused MRA model that additionally either contained or did not contain the only receptor-mediated feedback  
222 found in the first modelling round from S6K→IGF1 (Figure 3C and Figure 4A). Inclusion of the IGF receptor-  
223 mediated feedback led to a significantly better fit of the data for N206 and KELLY ( $\chi^2$   $p < 0.05$ ), but did  
224 not improve the IMR32 model (Figure 4C and D). Interestingly, the S6K→IGF1→RAF→MEK feedback is  
225 stronger in the N206 models, but the pathway-intrinsic feedback (ERK→RAF→MEK) is stronger in KELLY  
226 (Figure 4D). This highlights that all these cells display negative feedback regulation, but the strengths of  
227 the two layers of feedbacks are different between cell lines.

## 228 Parallel inhibition of MEK and IGFR leads to synergistic effects on the phos- 229 phosphoproteome

230 To gain a more systematic understanding of the effect of MEK and IGFR inhibition on the signalling states  
231 of the cells, we generated deep (phospho-)proteomics profiles using tandem mass-tag (TMT) based mass  
232 spectrometry (??). We measured the phospho- and total protein levels in IMR32 and N206 cells after 4h  
233 treatment with MEK and/or IGFR inhibitors and control cells. Although a similar number of phosphosites  
234 were dis-regulated in both cell lines (448 in IMR32, 615 in N206, FDR < 0.05), there was little overlap in the  
235 phospho-peptides differentially regulated between the two cell lines (Figure 5A), and this overlap was mostly  
236 limited to phospho-peptides affected by MEK inhibition (Supplementary Figure 16). In IMR32, IGFR  
237 inhibition had little effect, while the presence of MEK inhibition strongly affected the phosphoproteome  
238 (Figure 5B left). Moreover the effect of the combination of MEK and IGFR inhibitors was dominated by  
239 the effect of the MEK inhibition, with about two thirds of the differential phosphopeptides (96/149) being  
240 also regulated by MEK inhibitor alone. Accordingly, differentially phosphorylated peptides in IMR32 are  
241 enriched in MAPK targets (Supplementary Figure 17). In contrast, both MEK as well as IGFR inhibition  
242 induce strong alterations in the phosphoproteome in N206 (Supplementary Figure 16), affecting both mTOR



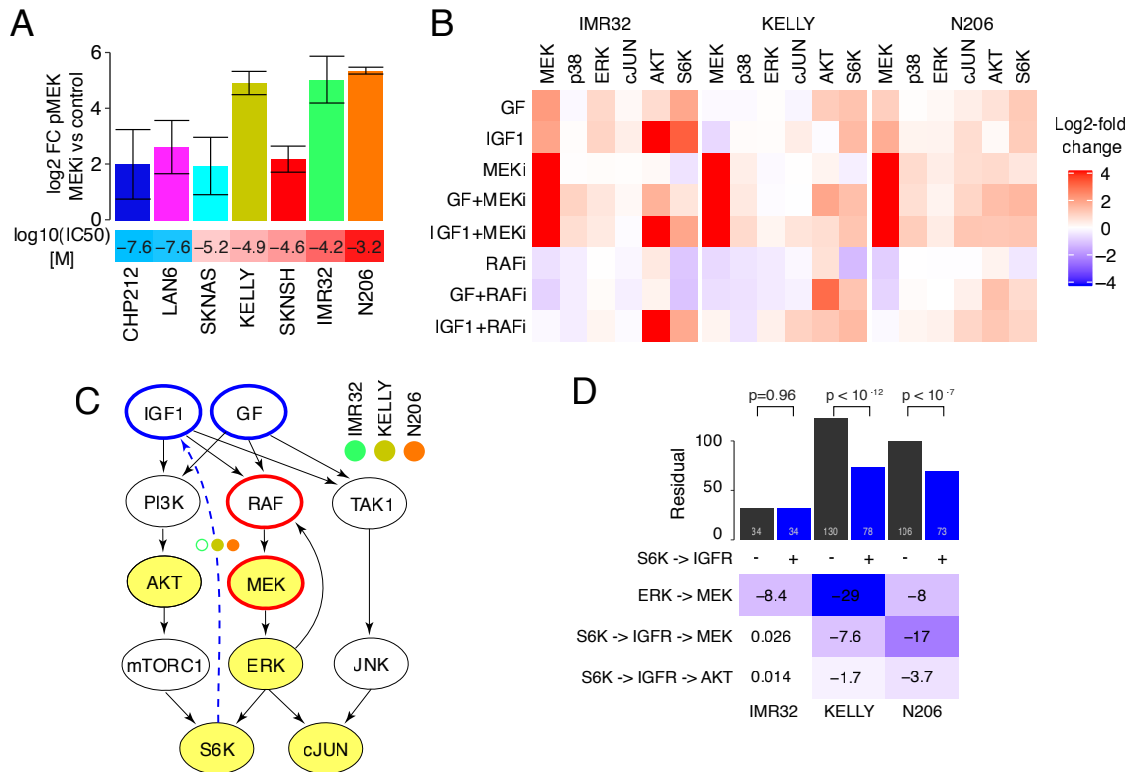

Figure 4: *AZD6244* resistant cell lines have strong feedback control of MAPK signalling **A**. Mean pMEK log<sub>2</sub>-fold change relative to control after *AZD6244* treatment in 7 neuroblastoma cell lines measured with bead-based ELISAS. Error bars represent 95% confidence interval. **B**. Measurement of 6 phosphoproteins (columns) after perturbation of N206, IMR32 and KELLY by either EGF (KELLY, N206) or NGF (IMR32) (together referred to as GF), IGF1, or control BSA in combination with Sorafenib (RAFi), *AZD6244* (MEKi) or control DMSO. Values are expressed in log<sub>2</sub>-fold change to BSA+DMSO control. **C**. Starting model and S6K→IGF1 receptor extension for the high pMEK responder cell lines. **D**. (top panel) Model residuals for N206, IMR32 and KELLY models with (black) or without (blue) an S6K→IGF1 receptor feedback link and corresponding p-value( $\chi^2$  test with df=1). (bottom panel) Parameter values of the high pMEK responder models including the S6K→IGF1 receptor link.

243 and MAPK signalling targets (Supplementary Figure 17), and the combination exhibits a synergistic effect  
 244 (Figure 5B right). Overall, 25 differentially phosphorylated sites in N206 show synergistic regulation, as  
 245 defined by a significant deviation of the combination from the sum of the individual treatment effects. Of  
 246 these, 18 phosphosites were synergistically down-regulated, and 7 sites showed up-regulation. In contrast,  
 247 only two sites showed synergy in IMR32 (Figure 5C). Among the synergistically downregulated phospho-  
 248 sites in N206 was S425 of the Eukaryotic translation initiation factor 4B (EIF4B), a protein involved in  
 249 regulation of translation and a known nexus between AKT and MAPK signalling (Shahbazian *et al*, 2006).  
 250 We performed a kinase substrate enrichment analysis (?) to explore how the signalling networks were  
 251 affected by the inhibitions (Figure 5D). For IMR32 cells, this analysis showed a decreased phosphorylation  
 252 of MEK and JAK targets and an increased phosphorylation of ARAF and BRAF targets in response to  
 253 MEK inhibition. Interestingly, in combination with IGFR inhibition the RAF activation is partially reversed  
 254 whereas other kinase targets seem rather unaffected. Overall this indicates a feedback activation of RAF  
 255 that does not totally compensate the loss of MEK activity. In N206 cells, the response to MEK inhibition  
 256 and the attenuation of the activation of RAF targets following double inhibitor treatment is similar to the  
 257 response in IMR32. However, in IMR32 cells IGFR inhibitor treatment had little impact on the kinome  
 258 whereas in a massive down-regulation of targets of a range of kinases occurred in N206 cells, covering the  
 259 PI3K/AKT/mTOR pathway (SGK1-3,AKT1,p70S6K), MAPK pathway (p90RSK) and many members of

260 the Protein Kinase C Family. This suggests a central role of IGFR signalling on central growth and survival  
261 pathways.

262 When we investigated the phosphorylation of components of the MAPK pathway more closely, we found  
263 many RAF negative feedback/crosstalk sites to be down-regulated after MEK inhibition (BRAF: T401, S750,  
264 T753; RAF1: S29, S642, S259) in both cell lines (Figure 5E). MEK1 S222/S226 phosphorylation is increased  
265 and pERK S204 decreased in both cell lines after MEK inhibition, in line with corresponding measurements  
266 using bead-based ELISAs. Among those down-regulated phosphosites that were only significant in the  
267 combination in N206 we detected many MYCN-phosphosites, notably MYCN S62, which is regulated by  
268 MAPK via CDK1 (?). Interestingly, this loss of S62 phosphorylated MYCN is associated with reduced  
269 MYCN levels (Figure 5F). This downregulation was observed in IMR32 and N206 cells upon single inhibition  
270 (IGFRi for N206 and MEKi for both cell lines), but only in N206 cells an even stronger downregulation could  
271 be observed upon double inhibition (Figure 5F). We confirmed these effects in Western blots for IMR32 and  
272 N206 cells (Figure 5G), and also found downregulation of MYCN upon IGFRi as well as MEKi treatment  
273 but no synergetic decrease after the combination treatment (Figure 5G). Another interesting protein that is  
274 regulated synergistically in N206 is Cyclin D1 (Figure 5H), a protein that is involved in cell cycle progression  
275 and whose loss likely mediates MYCN loss. It should be noted that only 5 proteins (PHGDH, DERL1,  
276 AMPD3, ARHGEF16 and CCND1) were found differentially affected with an FDR < 10%, highlighting that  
277 on this time scale phospho-protein changes dominated.

278 Taken together, the proteomics data is coherent with the model that MAPK signalling in N206 is con-  
279 trolled by a dual feedback structure involving RAF and IGFR, whereas it is mainly controlled by a RAF-  
280 mediated feedback in IMR32. It furthermore supports the notion that treatment with MEK and IGFR  
281 inhibitors would show synergy in N206.

## 282 Vertical inhibition can break feedback-mediated resistance

283 Feedback regulation is often a central aspect for drug resistance that could be overcome by a vertical inhibition  
284 strategy, where an inhibition of an upstream node prevents pathway reactivation. Based on our models, we  
285 tested if the additional application of an inhibitor targeting the feedback nodes (RAF and IGFR) would  
286 sensitise resistant cells toward MEK inhibition (Figure 6A). We quantified growth reduction after inhibiting  
287 IMR32, KELLY and N206 with different dose combinations of inhibitors against MEK (AZD6244), IGFR  
288 (AEW541) and RAF (LY3009120). As expected from the observed synergy of MEK and IGFR on MYCN  
289 levels (Figure 4F), and in agreement with our model predictions of strong IGFR-mediated feedback in N206  
290 (Figure 4D), there was a strong synergistic effect of the combination of MEK and IGFR inhibitions on growth  
291 in N206 but little in KELLY or IMR32 (Figure 6B).

292 When trying to overcome the model-derived strong ERK-RAF feedback found in all three cell lines with  
293 a combination of MEK and RAF inhibition we only found a synergistic effect for two of the three cell lines  
294 (N206 and KELLY), whereas IMR32 remained resistant and no synergy could be detected. We hypothesised  
295 that this observed resistance in IMR32 might be either because the vertical inhibition by MEKi and RAFi was  
296 molecularly not effective or that IMR32 might no longer depend on ERK signalling for survival and growth.  
297 To distinguish the former from the latter we decided to compare model simulation and measurements for  
298 perturbation effects of selected inhibitor combinations on pMEK and pERK in IMR32 and KELLY cells.

299 Based on the model simulations, in both cell lines the vertical inhibition of MEK + RAF inhibitor was  
300 predicted to suppress MAPK signalling much stronger than MEK inhibitor alone or in combination with an  
301 ERK inhibitor. Moreover, the suppressive effect was predicted to be even more profound in IMR32 than in  
302 KELLY (Figure 6C top). We then measured the effect on pMEK and pERK of MEK inhibitor alone and  
303 in combination with the RAF inhibitor LY3009120 or ERK inhibitor SCH772984 (Figure 6C bottom). The  
304 measurements qualitatively supported the model simulations showing that RAF inhibitor suppressed MEK  
305 feedback activation by AZD6244, and that this suppression is stronger in IMR32. Addition of the ERK  
306 inhibitor neither suppressed this feedback activation nor could it decrease ERK phosphorylation more than  
307 RAF inhibition, as also predicted by the model. This suggests that in agreement with the model simulations  
308 the combination of RAFi and MEKi is most effective in IMR32 to effectively suppress ERK activation and  
309 feedback-mediated re-activation. However, since the growth is least affected by this combination IMR32  
310 seems not to depend on ERK activity.

311 In the end, we identified 2 combinations effective at low drug concentrations against the MEK-inhibitor

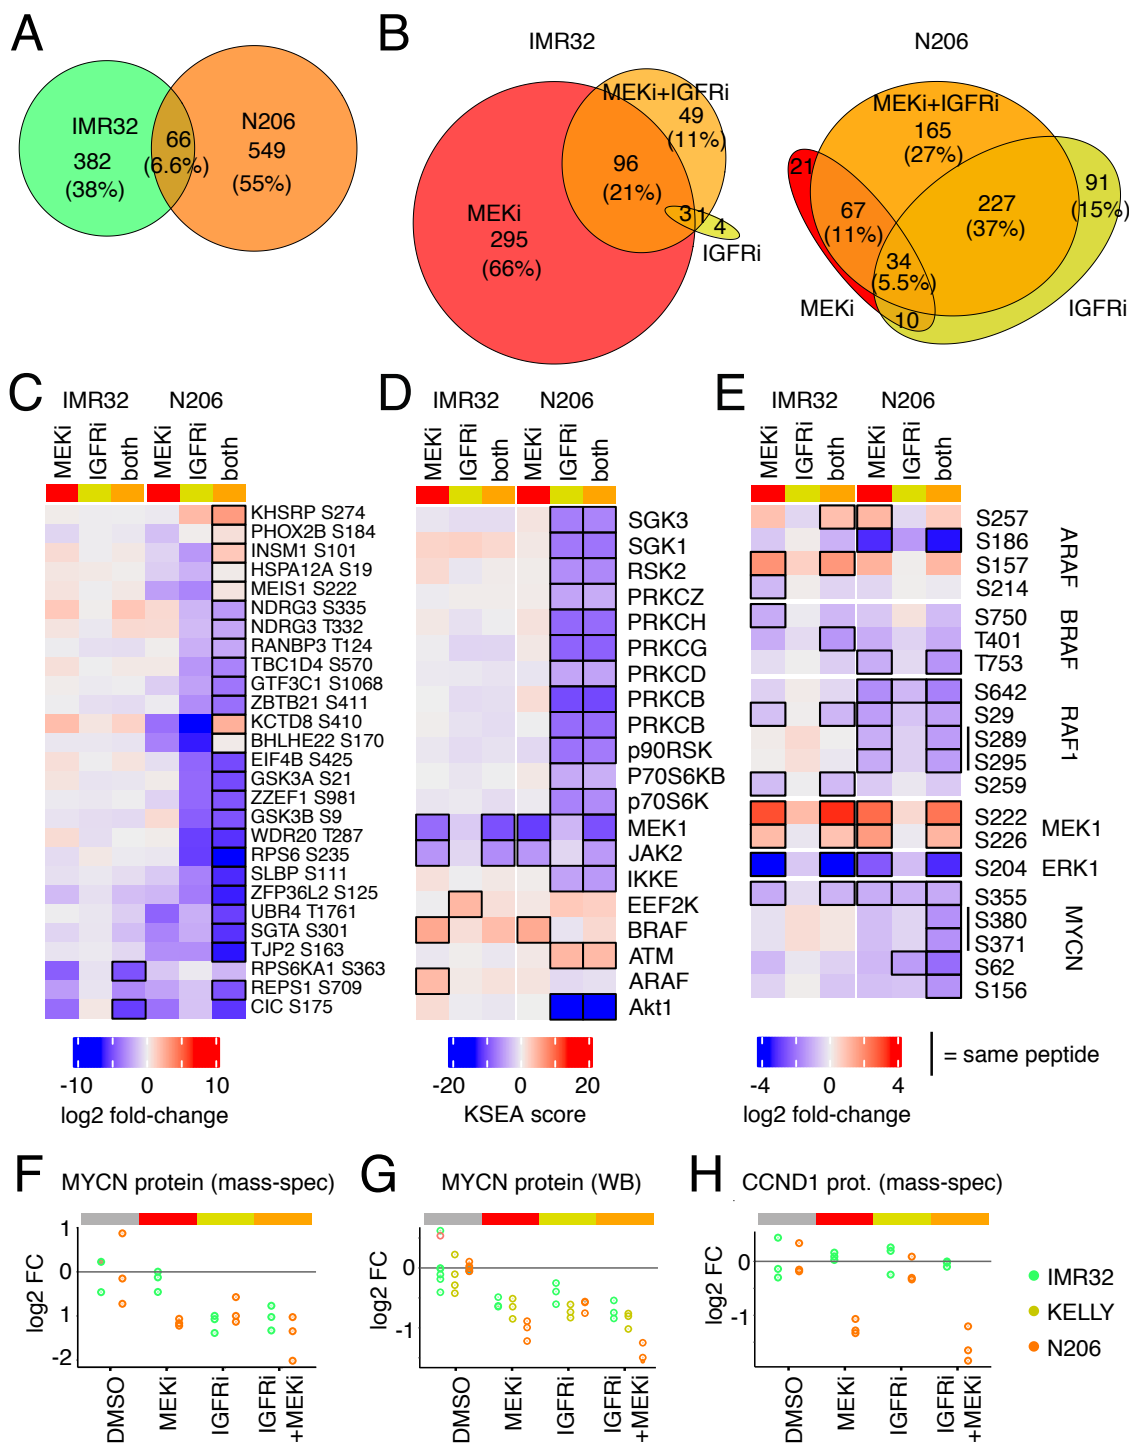

Figure 5: *Phosphoproteomics analysis reveals important variations in the response to combination treatment*  
 Venn diagram showing the overlap in differentially regulated phosphosites **A** between IMR32 and N206 or **B** between treatments for each cell line. **C** Phosphopeptides synergistically altered by MEK+IGFR combination. Black outline highlights where the change in the combination is significantly different to the sum of the individual changes (limma moderated t-test, FDR<5%). **D** Kinase substrate enrichment score using phosphositeplus annotations ; black outline highlights significant changes in activity for a given condition (limma moderated t-test, FDR<5%) **E** Log-fold change to DMSO for RAF/MAPK and MYCN phosphopeptides ; black outline shows significantly altered phosphosites per condition (limma moderated t-test, FDR<5%). **F-H** Relative levels compared to control of the total proteins levels, MYCN measured with mass spectrometry (**F**), Western blot (**G**), and CCND1 measured with mass spectrometry (**H**).

312 resistant cell lines KELLY and N206. As both KELLY and N206 have strong multi-layered feedbacks (Fig-  
313 ure 4D), we reasoned that a combination of IGFRI, RAFi and MEKi might be even more efficient as it  
314 targets both feedbacks, irrespective of their individual strength. We thus tested the effect of a combination  
315 of AEW541, AZD6244 and LY3009120 and observed a >80% reduction in viability of both KELLY and N206  
316 already at moderate concentration of all three drugs (300nM of AEW541, 50nM of LY3009120 and 500nM of  
317 AZD6244) making it a potential therapeutic option (Figure 6D and Supp\_data\_fig1\_drug\_sensitivity\_fig5\_synergies.zip).

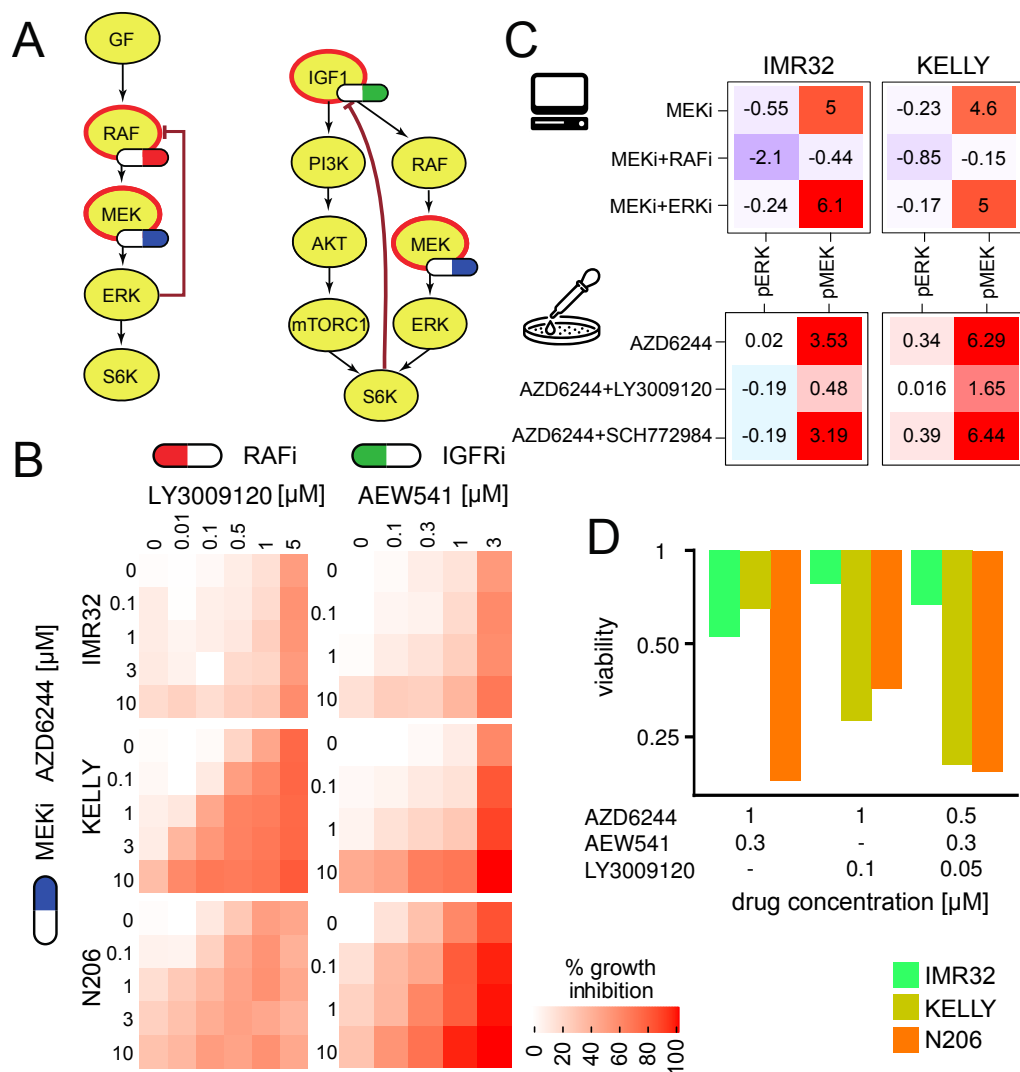

Figure 6: *AZD6244* resistant cell lines can be sensitised with combined inhibition with the *IGFR* inhibitor *AEW541* or the *RAF* inhibitor *LY3009120* **A**. Model-inferred targeting strategy of dual inhibition assessment by model simulations on pERK activity of 3 *AZD6244* resistant neuroblastoma cell lines under various levels of MEK inhibition and *IGFR* or *RAF* inhibition **B**. Corresponding growth inhibition measurements using the specified inhibitors.  $n=2$ . **C**. TOP: Model predictions of pERK and pMEK activity for MEK inhibition alone and in combination with inhibition of upstream kinase *RAF* or downstream kinase *ERK* for *KELLY* and *IMR32*. Values are log-fold changes to *IGF1* condition with inhibitor strength set to -1. **C**. BOTTOM: pERK and pMEK plex measurements in *KELLY* and *IMR32* after 90min treatment of the MEK inhibitor *AZD6244* in combination with either DMSO, *SCH772984* (*ERKi*, 10 $\mu$ M) or *LY3009120* (*RAFi*, 5 $\mu$ M) in cells grown with 10% FCS. Values are log-fold change to FCS medium condition. **D**. Viability of the cell lines for selected concentrations of dual and triple inhibitor treatments targeting MEK, *RAF* and *IGFR*.

## 318 Discussion

319 Neuroblastoma is a complex disease with distinct subtypes that display radically different outcomes, ranging  
320 from spontaneous regression in low-risk groups to only 50% survival of patients in the high risk neuroblastoma  
321 group. Mutations in RAS/MAPK signalling are a hallmark of high risk neuroblastoma, and also define a  
322 subgroup of patients with ultra-high-risk neuroblastoma and an even worse survival. Therefore targeted  
323 treatment might be a valid strategy to treat those patients. However, response to MEK inhibitors are very  
324 variable, and it is thus important to understand mechanisms of resistance and how to circumvent these.

325 In this work, we explored how a more quantitative understanding of signalling can be used to design  
326 combinatorial treatments to counteract drug resistance. We used a panel of deeply profiled cell lines rep-  
327 resenting high risk neuroblastoma and showed that the response to MEK inhibitors is variable, with some  
328 cell lines responding at low doses in the nM range, whereas others are highly resistant. By using signalling  
329 perturbation-response data, we characterised the signalling network surrounding MAPK. Analysis of that  
330 perturbation data with the modelling framework of modular response analysis unveiled that MAPK signalling  
331 is controlled by a multi-layered feedback with variable strength. A central finding was that MEK-inhibitor  
332 sensitive cells are controlled by low feedbacks within the MAPK cascade, whereas a subset of resistant cell  
333 lines shows strong multi-layered feedbacks that may be causal for resistance. Simulation of cell-line spe-  
334 cific models suggested that different combinations of inhibitors can be used to overcome resistance, and  
335 experiments could confirm these predictions in two out of three cell lines.

336 Our work highlights that systematic perturbation data are a powerful source to probe intracellular sig-  
337 nalling pathways. The connectivity of signalling pathways implies that minor quantitative alterations of the  
338 network can lead to many changes in response, not all of which alter the phenotype. In this work, we saw  
339 that multivariate analysis of the perturbation data alone was not fruitful to separate cell lines with respect  
340 to their drug sensitivity. In contrast, integration of data by models highlighted that variations of only a few  
341 links is enough to explain the differences between those cell lines. Modelling was therefore key to integrate  
342 the data and to unveil feedback loops as potential sources of resistance.

343 In our work we used a maximum likelihood version of MRA, but there are multiple other methods  
344 that might be suited to reconstruct semi-quantitative signalling networks from perturbation data. Oates  
345 *et al* (2012) proposed a bayesian variant which overcomes the linearity assumption of MRA using chemical  
346 kinetics to guide the inference and fuzzy-logic models such as used by Terfve *et al* (2015) also show good  
347 performance to reconstruct network topology from signalling data. However getting quantitative values for  
348 the interactions between components of a signalling networks from a small set of perturbations requires MRA  
349 variants (Santra *et al*, 2013; Dorel *et al*, 2018) or necessitates time-resolved perturbation data which limits  
350 the number of perturbations that can be studied simultaneously (Invergo and Beltrao, 2018). While boolean  
351 models are very good strategies to model large signalling networks and complex synergies (Niederdorfer *et al*,  
352 2020), they would be unable to capture quantitative differences in feedback regulation, which are the key  
353 resistance mechanisms uncovered in this work.

354 Drug resistance to targeted therapies have been attributed to negative feedback loops in multiple tumours.  
355 Most importantly, sensitivity to MEK inhibitors is strongly influenced by a pathway-intrinsic feedback, where  
356 ERK phosphorylates RAF at multiple sites (Sturm *et al*, 2010; Fritsche-Guenther *et al*, 2011; Friday *et al*,  
357 2008). This feedback has been shown to be very strong in epithelial cells leading to pathway robustness  
358 (Fritsche-Guenther *et al*, 2011), which can be overcome by vertical inhibition of RAF (Sturm *et al*, 2010).  
359 Another mode of feedback regulation is the inhibition of receptors by pathways. An example is the inhibitory  
360 regulation of EGFR by the MAPK pathway (Prahallad *et al*, 2012; Klinger *et al*, 2013). When inhibiting  
361 MAPK signalling by MEK or RAF inhibitors, this feedback leads to hyper-sensitisation of EGFR, which in  
362 turn reactivates MAPK signalling and additionally activates other downstream pathways such as PI3K/AKT  
363 signalling. Also in this case vertical inhibition can help to overcome this mode of resistance, by co-targeting  
364 the MAPK pathway and the upstream receptor.

365 In this work, we showed that some neuroblastoma cell lines possess two major layers of feedback in  
366 MAPK signalling. One of these feedbacks is pathway-intrinsic (from ERK to RAF) and one is a feedback to  
367 the IGF receptor. Interestingly, different cell lines show different relative strength of feedbacks from ERK  
368 to RAF and IGF, and simulations show that those require different strategies for vertical inhibition. For  
369 the cell line KELLY, modelling unveiled an extremely strong negative feedback from ERK to RAF. This  
370 suggests that a combination of MEK and RAF inhibitor will be more potent than a combination of MEK

371 and IGFR inhibitor. In contrast, in the cell line N206, both feedbacks have similar strength, suggesting  
372 that both combinations might be potent. In line with these predictions, experiments showed that in KELLY  
373 indeed the combination of MEK and RAF inhibitors is much more potent to reduce growth compared to the  
374 combination of MEK and IGFR. In contrast, in N206 both combinations reduce growth.

375 Our phospho-proteomics analysis shows that the combination of MEK and IFGR also has different effects  
376 in the two cell lines: Whereas it shows clearly synergistic effects of the combination in N206, there is no  
377 sign of synergy in IMR32. By aggregating the phosphoproteome to kinase activities using kinase enrichment  
378 scores, one can also get insight into the re-wiring of signalling after perturbation. In our case, it clearly  
379 shows how the re-activation of RAF after MEK inhibition is inhibited by the treatment with IGFR inhibitors.  
380 The phosphoproteome also showed that the dual treatment of IGFR and MEK manifests itself in synergistic  
381 downregulation of important proteins that are regulated by convergent signalling of MEK and AKT, such  
382 as MYCN and EIF4B.

383 Interestingly, a third resistant cell line, IMR32, showed no response in growth to MEK inhibitor in vertical  
384 combination with either RAF and/or IGFR inhibitor on growth, even though it's cellular ERK signalling was  
385 strongly responsive. This highlights that cancer cells might lose ERK-mediated cell cycle control, suggesting  
386 that coupling of cellular phenotype to signalling pathways is not necessarily strict (Cerezo *et al*, 2009; Castro  
387 *et al*, 2012). To more directly model changes on cellular phenotypes such as growth or viability, models of  
388 signalling would need to be connected to phenotypic readouts (Korkut *et al*, 2015). In addition, it might  
389 be beneficial to include downstream readouts such as cyclin levels or CDK activation that are more directly  
390 involved in cell cycle progression and can be deregulated in cancer (Keyomarsi and Pardee, 1993; Sung *et al*,  
391 2014). It should be also pointed out that our measurements only encompass one time point and that later  
392 dynamics of the MAPK pathway, such as transcriptional feedbacks, could also explain IMR32 resistance to  
393 vertical inhibition.

394 In summary, our results show that a quantitative understanding of differences in signalling networks can  
395 be very helpful to understand resistance, and to derive effective treatments. Future work should investigate  
396 if those feedback mechanisms exist in tumours *in vivo* and whether they could explain relapses. Our descrip-  
397 tion of the wiring of the RAS/MAPK pathway in neuroblastoma will support the design of clinical trials  
398 using combinatorial treatments to prevent or overcome therapy resistance. In addition, the framework de-  
399 scribed here could be used to analyse signalling in tumours of individual patients While it will be technically  
400 challenging to assess signalling network responses in tumour patients, *ex vivo* cultures - so-called avatars  
401 - could be an option (Brandt *et al*, 2019; Saez-Rodriguez and Blüthgen, 2020). We envision that learning  
402 features of robustness and vulnerability of tumours from signalling models on cell line panels might greatly  
403 reduce the required set of perturbations in those avatars that are sufficient to inform a model, and allow  
404 reliable stratification and prediction of treatment options.

## 405 **Materials and Methods**

### 406 **Cell lines**

407 The neuroblastoma cell lines were obtained by courtesy of the Deubzer lab (Charité, Berlin) as part of the  
408 Terminate-NB consortium. The identity of the cell lines was confirmed with STR profiling (see Supplemen-  
409 tary Table TNB\_STR\_Results.xlsx), which were generated by Eurofins Cell Line Authentication Test and  
410 matched with the Cellosaurus STR similarity research tool (Robin *et al*, 2019). All cell lines were grown in  
411 DMEM (Gibco, Life Technologies) with 3.5 g/L glucose (Sigma), 5 mM glutamine (Gibco, Life Technologies)  
412 and 10% FCS (Pan Biotech).

### 413 **Whole exome sequencing**

414 DNA was extracted from the human neuroblastoma cell lines (see above), using the Nucleospin Tissue kit  
415 (Macherey-Nagel) according to the manufacturer's protocol. From the DNA, libraries for whole-exome se-  
416 quencing were prepared using the SureSelect Human All Exon V7 kit (Agilent) and the Illumina TruSeq  
417 Exome kit. The libraries were sequenced on Illumina HiSeq 4000 and Illumina NovaSeq 6000 sequencers.  
418 The read sequences and base quality scores were demultiplexed and stored in Fastq format using the Illu-  
419 mina bcl2fastq software v2.20. Adapter remnants and low-quality read ends were trimmed off using custom

420 scripts. The quality of the sequence reads was assessed using the FastQC software. Reads were aligned to the  
421 human genome, assembly GRCh38, using the bwa mem software version 0.7.10 (Li, 2013), and duplicate read  
422 alignments were removed using samblaster version 0.1.24 (Faust and Hall, 2014). Copy-number alterations  
423 were determined using cnvkit version 0.1.24 (Talevich *et al*, 2016). Single-nucleotide variants (SNVs) were  
424 identified using strelka version 2.9.10 (Kim *et al*, 2018). Afterwards, potential germline variants were filtered  
425 out by excluding all SNVs that had also been observed in at least 1% of samples in cohorts of healthy individ-  
426 uals, namely the 1000 Genomes Project (Auton *et al*, 2015) and the NHLBI GO Exome Sequencing Project  
427 (Fu *et al*, 2013) cohorts. The raw data are available on ENA under the accession number PRJEB40670.

## 428 RNA sequencing

429 The cell lines were sequenced in 3 separate batches. The IMR32, KELLY, SKNAS, LAN6, NBEB1 cell  
430 lines were prepared in triplicate, using a paired-end stranded protocol with 2x75 cycles per fragment and 2  
431 more cell lines (NGP, SKNSH) were prepared in duplicate, using a paired-end stranded protocol with 2x150  
432 cycles. Two more libraries (CHP212 and N206) were prepared using a paired-end stranded protocol with  
433 2x75 cycles per fragment.

434 Raw sequencing data were rigorously checked for quality using FastQC. The reads were aligned to the  
435 human genome GRCh38 (without patches or haplotypes) and the GENCODE transcript annotation set  
436 using the STAR aligner software (Dobin *et al*, 2013). The read counts per gene were obtained using the  
437 featurecounts (Liao *et al*, 2014) method from the subread software package. The raw data are available on  
438 ENA under the accession number PRJEB40670.

## 439 Drug sensitivity assay

Cells grown for 1 day in full medium were treated with the indicated drugs in 4 different concentrations  
(0.1, 1, 10 and 100  $\mu$ M Figure 1B) along with the corresponding DMSO controls on the same plate. The  
growth of the cells was tracked by phase contrast imaging for 72h with 4 images per well taken every 2h using  
the Incucyte Zoom instrument (Essen BioScience) and the confluency estimated using the Incucyte Zoom  
Analysis software (Essen BioScience). The growth rate was estimated with a linear fit on the log-transformed  
confluency, and the IC50 was determined by fitting a sigmoid of the form:

$$V = \frac{1}{1 + \exp(-\log(C) + IC50) \times S}$$

440 to normalised growth rates (implemented in <https://github.com/MathurinD/drugResistance>).  $V$  is the  
441 growth rate relative to DMSO control,  $C$  is the concentration and the parameters  $IC50$  and slope  $S$  are fitted.  
442 See supplement *Supp\_data\_fig1-4\_TNB\_ic50.csv* for the fitted parameters and *Supp\_data\_fig1\_drug\_sensitivity\_fig5\_syn*  
443 for the raw data and analysis scripts.

## 444 Synergy estimation

445 For the synergy assay, cells seeded the day before were treated with different concentrations of AZD6244  
446 (0.1, 1, 10, 30 and 50  $\mu$ M, Selleck Chemicals) in combination with NVP-AEW541 (0.1, 0.3, 1, 3 and 10  $\mu$ M,  
447 Cayman Chemical) or LY3009120 (0.1, 0.3, 1, 3 and 15  $\mu$ M, Selleckchem). The synergy scores were deter-  
448 mined using the R package synergyfinder (Ianevski *et al* (2017).) with the relative growth rates thresholded  
449 between 0 and 1 as input (0 meaning no growth or cell death and 1 meaning growth as fast as the DMSO  
450 control).

## 451 Perturbation assay

452 Cells were seeded in 24 well plates and grown for 2 days in full medium followed by 24h in FCS-free medium  
453 before treatment with the same concentrations of ligands and inhibitors.

454 All inhibitors were dissolved in DMSO and cells were treated for 90 minutes at the following concentrations:  
455 GDC0941 (1  $\mu$ M, Selleck Chemicals), AZD6244/Selumetinib (10  $\mu$ M, Selleck Chemicals), MK2206 2HCl  
456 (10  $\mu$ M, Selleck Chemicals), Rapamycin (10  $\mu$ M, Selleck Chemicals), Sorafenib (10  $\mu$ M, Selleck Chemicals),



457 GS-4997 (10  $\mu$ M, Selleck Chemicals) and TAE684 (10  $\mu$ M, Selleck Chemicals).  
458 The cells were treated for 30 minutes (60 minutes after inhibitor treatment) with ligands in a 0,1% PBS/BSA  
459 carrier solution at the following concentrations: EGF (25 ng/mL, Peprotech), PDGF (10 ng/mL, Peprotech),  
460 NGF (50 ng/mL, Peprotech) and IGF1 (100 ng/mL, Peprotech).  
461 The cells were then lysed using BioRad Bio-Plex Cell Lysis Kit and measured using the Bio-Plex MAGPIX  
462 Multiplex Reader with a custom kit from ProtAtOnce with analytes p-cJUN (S63), p-p38 (T180/Y182), p-  
463 AKT (S473), p-ERK1/2 (T202/Y204,T185/Y187), p-MEK1 (S217/S221), p-S6K (T389) and p-RSK1 (S380).  
464 The p-RSK1 (S380) readout was discarded because of a low dynamic range.  
465 The same procedure and analytes were used for the other perturbation assays in this paper. Refer to the  
466 main text for the exact inhibitors and concentrations used for each experiment.

## 467 Signalling models

The model for each cell line was fitted separately from the corresponding perturbation data with the *createModel* function from the R package STASNet ((Dorel *et al*, 2018), <https://github.com/molsysbio/STASNet/releases/tag/Dorel2020>). STASNet implements the variation of Modular Response Analysis (MRA) described in Klinger *et al* (2013) and Dorel *et al* (2018) that implements a dual effect of inhibitors as both a negative stimulus and a disruption of signal propagation. Under the hypothesis of pseudo-steady-state and locally linear dependencies between nodes, MRA models the response to a perturbation as

$$R = -\tilde{r}^k * S \quad (1)$$

468 where  $R_{ij}$  is the global response of node  $j$  after perturbation of node  $i$ ,  $\tilde{r}_{ij}^k$  is the local response of node  $j$   
469 after perturbation of node  $i$  taking into account the effect of inhibition of node  $k$ , and  $S_{ik}$  is the sensitivity  
470 of node  $i$  to perturbation  $k$ . The pAKT readout was systematically removed if AKT inhibition was present  
471 because the AKT inhibitor MK2206 blocks AKT autophosphorylation (Yan, 2009), i.e acts upstream of the  
472 AKT node, while STASNet expect inhibitors to act downstream of their annotated target.

473 We designed a literature network consisting of the MAPK and PI3K/AKT signalling pathway as anno-  
474 tated in KEGG (<https://www.genome.jp/kegg/pathway/hsa/hsa04010.html> and [https://www.genome.jp/kegg-bin/show\\_pathway?hsa04151](https://www.genome.jp/kegg-bin/show_pathway?hsa04151)) with intermediate nodes suppressed, the addition of the well doc-  
475 umented ERK->RAF feedback and all receptors corresponding to RTK. Each cell line was fitted first on  
476 the literature network then extended independently of the others. Those models with final topology yielded  
477 similar values for the inhibition parameters so we generated new models with those parameters fixed to the  
478 mean value across all 6 models and re-fitted each cell line with inhibitor values fixed. With this fitting strat-  
479 egy the links between models became directly comparable as the non identifiability induced by the inhibitor  
480 parameters was removed (Figure 3A). The high pMEK responder cell line models were fitted using the same  
481 procedure.  
482

## 483 Western Blot

484 Cells were grown to confluency for 3 days in full medium and treated with AEW541 10 $\mu$ M and/or AZD6244 10 $\mu$ M  
485 or control DMSO for 4h then lysed using BioRad Bio-Plex Cell Lysis Kit. The lysates were run for 3h at  
486 a constant 45 mA in 10% acrylamid gels and blotted for 45 minutes at 400 mA on nitrocellulose. The  
487 membrane were stained for total protein using Pierce<sup>TM</sup> Reversible Protein Stain (Thermofischer 24580) and  
488 blocked for 30 minutes in 1:1 PBS:Odyssey blocking buffer. The primary antibodies were incubated overnight  
489 at 4C one at a time and the corresponding secondary during the following day for 2h at room temperature in  
490 1:1 PBST/Odyssey. We used the following primary antibodies: pIGF1R beta<sup>Y1135/Y1136</sup> 1:1000 (CST 3024),  
491 pAKT<sup>S473</sup> 1:2000 (CST 4060), total MYCN 1:200 (Santa Cruz sc-53993) and pMEK<sup>S217/S221</sup> 1:1000 (CST  
492 9154).

## 493 TMT (phospho-)proteomics

494 For the proteomics and phosphoproteomics cells were grown to confluency for 3 days in full medium and  
495 treated with AEW541 10 $\mu$ M and/or AZD6244 10 $\mu$ M or control DMSO for 4h.

496 We used an adapted version of the TMT workflow (?): samples were reduced, alkylated and digested with  
497 a combination of LysC (Wako) and Trypsin (Promega) using the the single-pot, solid-phase-enhanced sample  
498 preparation (?). For each sample, an equal amount of peptide was then chemically labelled with TMTpro  
499 reagents (?). Samples were randomly assigned to one of the first 15 TMT channels, while the 16th channel was  
500 composed of a superset of all the samples to allow multi-plex normalisation. Equal amounts of the labelling  
501 reactions were combined in two TMT16 plexes, desalted via SepPak columns (Waters) and fractionated via  
502 high-pH fractionation (?) on a 96 minutes gradient from 3 to 55% acetonitrile in 5 mM ammonium formate,  
503 each fraction collected for 1 minute then combined into 24 fractions. From each fraction, an aliquot was  
504 used to measure the total proteome while the remaining peptides were combined into 12 fractions and used  
505 as input for an immobilised metal affinity chromatography using an Agilent Bravo system. For the total  
506 proteome analysis, peptides were on-line fractionated on a multi-step gradient from 0 to 55% acetonitrile in  
507 0.1% formic acid prior injection in a QExactive HF-x mass spectrometer. Samples were acquired using a data  
508 dependent acquisition strategy with MS1 scans from 350 to 1500 m/z at a resolution of 60 000 (measured  
509 at 200 m/z), maximum injection time (IT) of 10 ms and an automatic gain control (AGC) target value of  
510  $3 \times 10^6$ . The top 20 most intense precursor ions with charges from +2 to +6 were selected for fragmentation  
511 with an isolation window of 0.7 m/z. Fragmentation was done in an HCD cell with a normalised collision  
512 energy of 30% and analysed in the detector with a resolution of 45 000 (200 m/z), AGC target value of  $10^5$ ,  
513 maximum IT of 86 ms. We used the same parameters for phosphoproteome analysis with the exception of  
514 MS2 maximum IT that was set to 240 ms.

515 The acquired raw files were analysed using MaxQuant v1.6.10.43 (?), with TMTpro tags manually added  
516 as fixed modifications and used for quantitation The correction factors for purity of isotopic labels was set  
517 according to vendor specification and minimum reporter precursor intensity fraction was set to 0.5. The  
518 resulting protein groups were filtered for potential protein contaminants, protein groups only identified via  
519 peptides decorated with modification or hits in the pseudo-reverse database used for FDR control. The  
520 resulting intensities of each sample channel were normalised to the intensity of the 16th reference channel,  
521 then median-centered and normalised according to the median-absolute deviation. Identified phosphopep-  
522 tides were similarly filtered, with the exception of filtering based on modified sites, and normalised using the  
523 same strategy.

524 Differentially expressed phosphopeptides were called using the *limma* package (?) with a false discovery  
525 rate of 0.05 on treatment minus control contrasts. Synergies were computed using a contrast fit of the  
526 combination minus the sum of single treatments. Kinase substrate activity was implemented in R using the  
527 ratio of the mean z-score as described in ? and computed for kinase-substrate sets from PhosphoSitePlus (?).  
528 The normalised intensities and scripts used for the analysis can be found at [https://itbgit.biologie.hu-berlin.de/dorel/phosphoproteomics\\_tnb\\_perturbations](https://itbgit.biologie.hu-berlin.de/dorel/phosphoproteomics_tnb_perturbations).  
529

## 530 Data availability

531 The datasets produced in this study are available in the following databases:

- 532 • RNA-Seq data: ENA PRJEB40670 (<https://www.ebi.ac.uk/ena/browser/view/PRJEB40670>)
- 533 • STASNet package: GitHub (<https://github.com/molsysbio/STASNet/releases/tag/Dorel2020>)
- 534 • Phosphoproteomics: [https://itbgit.biologie.hu-berlin.de/dorel/phosphoproteomics\\_tnb\\_perturbations](https://itbgit.biologie.hu-berlin.de/dorel/phosphoproteomics_tnb_perturbations)

## 535 Acknowledgements

536 We thank Aleixandria McGearey for technical assistance with preparing the whole-exome sequencing li-  
537 braries, Martha Hergesekke for help in cell culture, as well as Jasmin Wünschel for providing the cell lines.

## 538 Author Contributions

539 Nils Blüthgen, Bertram Klinger, Angelika Eggert, Johannes Schulte, Matthias Selbach and Dieter Beule de-  
540 signed the study and supervised data analysis. Mathurin Dorel collected and analysed the perturbation data,

541 the IC50 data, the synergy data, the sequencing data and the proteomics data, and built the models. Falk  
542 Hertwig, Matthias Ziehm, Michal Nadler-Holly and Joern Toedling collected the RNA-Seq and WES data.  
543 Joern Toedling and Eric Blanc analysed the WES-Seq data. Joern Toedling and Clemens Messerschmidt  
544 analysed the RNA-Seq data. Tommaso Mari measured and analysed the proteomics and phosphoproteomics  
545 data. Anja Sieber performed the Western blot measurements.

## 546 Funding

547 We acknowledge funding from the Berlin Institute of Health (CRG Terminate NB) and from the BMBF  
548 (grant MSTARS, 161L0220A).

549 The authors declare that they have no conflict of interest.

## 550 References

551 Ackermann S, Cartolano M, Hero B, Welte A, Kahlert Y, Roderwieser A, Bartenhagen C, Walter E, Gecht J,  
552 Kerschke L, Volland R, Menon R, Heuckmann JM, Gartlgruber M, Hartlieb S, Henrich KO, Okonechnikov  
553 K, Altmüller J, Nürnberg P, Lefever S, *et al* (2018) A mechanistic classification of clinical phenotypes in  
554 neuroblastoma. *Science* **362**: 1165–1170

555 Auton A, Abecasis GR, Altshuler DM, Durbin RM, Bentley DR, Chakravarti A, Clark AG, Donnelly P,  
556 Eichler EE, Flicek P, Gabriel SB, Gibbs RA, Green ED, Hurles ME, Knoppers BM, Korbel JO, Lander  
557 ES, Lee C, Lehrach H, Mardis ER, *et al* (2015) A global reference for human genetic variation

558 Barone G, Anderson J, Pearson ADJ, Petrie K, Chesler L (2013) New strategies in neuroblastoma: Therapeu-  
559 tic targeting of MYCN and ALK. *Clinical cancer research an official journal of the American Association*  
560 *for Cancer Research* **19**: 5814–21

561 Brandt R, Sell T, Lüthen M, Uhlitz F, Klinger B, Riemer P, Giesecke-Thiel C, Schulze S, El-Shimy IA,  
562 Kunkel D, Fauler B, Mielke T, Mages N, Herrmann BG, Sers C, Blüthgen N, Morkel M (2019) Cell type-  
563 dependent differential activation of ERK by oncogenic KRAS in colon cancer and intestinal epithelium.  
564 *Nature Communications* **10**: 2919

565 Bresler SC, Weiser DA, Huwe PJ, Park JH, Krytska K, Ryles H, Laudenslager M, Rappaport EF, Wood  
566 AC, McGrady PW, Hogarty MD, London WB, Radhakrishnan R, Lemmon MA, Mossé YP (2014) ALK  
567 Mutations Confer Differential Oncogenic Activation and Sensitivity to ALK Inhibition Therapy in Neu-  
568 roblastoma. *Cancer Cell* **26**: 682–694

569 Britschgi A, Andraos R, Brinkhaus H, Klebba I, Romanet V, Müller U, Murakami M, Radimerski T, Bentires-  
570 Alj M (2012) JAK2/STAT5 Inhibition Circumvents Resistance to PI3K/mTOR Blockade: A Rationale  
571 for Cotargeting These Pathways in Metastatic Breast Cancer. *Cancer Cell* **22**: 796–811

572 Castro AF, Campos T, Babcock JT, Armijo ME, Martínez-Conde A, Pincheira R, Quilliam LA (2012) M-  
573 Ras induces Ral and JNK activation to regulate MEK/ERK-independent gene expression in MCF-7 breast  
574 cancer cells. *Journal of Cellular Biochemistry* **113**: 1253–1264

575 Cerezo A, Guadamillas MC, Goetz JG, Sánchez-Perales S, Klein E, Assoian RK, del Pozo MA (2009) The  
576 Absence of Caveolin-1 Increases Proliferation and Anchorage- Independent Growth by a Rac-Dependent,  
577 Erk-Independent Mechanism. *Molecular and Cellular Biology* **29**: 5046–5059

578 Corcoran RB, Ebi H, Turke AB, Coffee EM, Nishino M, Cogdill AP, Brown RD, Pelle PD, Dias-Santagata  
579 D, Hung KE, Flaherty KT, Piris A, Wargo JA, Settleman J, Mino-Kenudson M, Engelman JA (2012)  
580 EGFR-mediated reactivation of MAPK signaling contributes to insensitivity of BRAF-mutant colorectal  
581 cancers to RAF inhibition with vemurafenib. *Cancer Discovery* **2**: 227–235

- 582 De Bernardi B, Nicolas B, Boni L, Indolfi P, Carli M, Di Montezemolo LC, Donfrancesco A, Pession A,  
583 Provenzi M, Di Cataldo A, Rizzo A, Tonini GP, Dallorso S, Conte M, Gambini C, Garaventa A, Bonetti  
584 F, Zanazzo A, D'Angelo P, Bruzzi P (2003) Disseminated neuroblastoma in children older than one year  
585 at diagnosis: Comparable results with three consecutive high-dose protocols adopted by the Italian Co-  
586 Operative Group for Neuroblastoma. *Journal of Clinical Oncology* **21**: 1592–1601
- 587 Dobin A, Davis CA, Schlesinger F, Drenkow J, Zaleski C, Jha S, Batut P, Chaisson M, Gingeras TR (2013)  
588 STAR: Ultrafast universal RNA-seq aligner. *Bioinformatics* **29**: 15–21
- 589 Dorel M, Klinger B, Gross T, Sieber A, Prahallad A, Bosdriesz E, Wessels LF, Blüthgen N (2018) Modelling  
590 signalling networks from perturbation data. *Bioinformatics* **34**: 4079–4086
- 591 Eleveld TF, Oldridge DA, Bernard V, Koster J, Daage LC, Diskin SJ, Schild L, Bentahar NB, Bellini A,  
592 Chicard M, Lapouble E, Combaret V, Legoix-Né P, Michon J, Pugh TJ, Hart LS, Rader J, Attiyeh EF,  
593 Wei JS, Zhang S, *et al* (2015) Relapsed neuroblastomas show frequent RAS-MAPK pathway mutations.  
594 *Nature genetics* **47**: 864–71
- 595 Faust GG, Hall IM (2014) SAMBLASTER: fast duplicate marking and structural variant read extraction.  
596 *Bioinformatics* **30**: 2503–2505
- 597 Finch AR, Caunt CJ, Perrett RM, Tsaneva-Atanasova K, McArdle CA (2012) Dual specificity phosphatases  
598 10 and 16 are positive regulators of EGF-stimulated ERK activity: Indirect regulation of ERK signals by  
599 JNK/p38 selective MAPK phosphatases. *Cellular Signalling* **24**: 1002–1011
- 600 Friday BB, Yu C, Dy GK, Smith PD, Wang L, Thibodeau SN, Adjei AA (2008) BRAF V600E disrupts  
601 AZD6244-induced abrogation of negative feedback pathways between extracellular signal-regulated kinase  
602 and Raf proteins. *Cancer Research* **68**: 6145–6153
- 603 Fritsche-Guenther R, Witzel F, Sieber A, Herr R, Schmidt N, Braun S, Brummer T, Sers C, Blüthgen  
604 N (2011) Strong negative feedback from Erk to Raf confers robustness to MAPK signalling. *Molecular*  
605 *Systems Biology* **7**: 489–489
- 606 Fu W, O'Connor TD, Jun G, Kang HM, Abecasis G, Leal SM, Gabriel S, Rieder MJ, Altshuler D, Shendure  
607 J, Nickerson DA, Bamshad MJ, NHLBI Exome Sequencing Project NES, Akey JM (2013) Analysis of  
608 6,515 exomes reveals the recent origin of most human protein-coding variants. *Nature* **493**: 216–220
- 609 Hallberg B, Palmer RH (2016) *The role of the ALK receptor in cancer biology*. volume 27. Oxford University  
610 Press
- 611 Hood FE, Klinger B, Newlaczyl AU, Sieber A, Dorel M, Oliver SP, Coulson JM, Blüthgen N, Prior IA (2019)  
612 Isoform-specific Ras signaling is growth factor dependent. *Molecular Biology of the Cell* **30**: 1108–1117
- 613 Ianevski A, He L, Aittokallio T, Tang J (2017) SynergyFinder: A web application for analyzing drug com-  
614 bination dose-response matrix data. *Bioinformatics* **33**: 2413–2415
- 615 Invergo BM, Beltrao P (2018) Reconstructing phosphorylation signalling networks from quantitative phos-  
616 phoproteomic data. *Essays in Biochemistry* **62**: 525–534
- 617 Johnsen JI, Dyberg C, Fransson S, Wickström M (2018) Molecular mechanisms and therapeutic targets in  
618 neuroblastoma. *Pharmacological Research* **131**: 164–176
- 619 Keyomarsi K, Pardee AB (1993) Redundant cyclin overexpression and gene amplification in breast cancer  
620 cells. *Proceedings of the National Academy of Sciences of the United States of America* **90**: 1112–1116
- 621 Kiessling MK, Curioni-Fontecedro A, Samaras P, Lang S, Scharl M, Aguzzi A, Oldridge DA, Maris JM, Rogler  
622 G (2016) Targeting the mTOR complex by everolimus in NRAS mutant neuroblastoma. *PLoS ONE* **11**
- 623 Kim S, Scheffler K, Halpern AL, Bekritsky MA, Noh E, Källberg M, Chen X, Kim Y, Beyter D, Krusche P,  
624 Saunders CT (2018) Strelka2: fast and accurate calling of germline and somatic variants. *Nature Methods*  
625 **15**: 591–594

- 626 Klinger B, Blüthgen N (2014) Consequences of feedback in signal transduction for targeted therapies. *Bio-*  
627 *chemical Society Transactions* **42**: 770–775
- 628 Klinger B, Sieber A, Fritsche-Guenther R, Witzel F, Berry L, Schumacher D, Yan Y, Durek P, Merchant  
629 M, Schäfer R, Sers C, Blüthgen N (2013) Network quantification of EGFR signaling unveils potential for  
630 targeted combination therapy. *Molecular Systems Biology* **9**: 673
- 631 Korkut A, Wang W, Demir E, Aksoy BA, Jing X, Molinelli EJ, Babur Ö, Bemis DL, Onur Sumer S, Solit DB,  
632 Pratilas CA, Sander C (2015) Perturbation biology nominates upstream-downstream drug combinations  
633 in RAF inhibitor resistant melanoma cells. *eLife* **4**: e04640
- 634 Kyo Y, Tanaka T, Hayashi K, Iehara T, Kaneko M, Hosoi H, Sugimoto T, Hamasaki M, Kobayashi M, Sawada  
635 T (2011) Identification of therapy-sensitive and therapy-resistant neuroblastoma subtypes in stages III,  
636 IVs and IV. *Cancer Letters* **306**: 27–33
- 637 Lake D, Corrêa SAL, Müller J (2016) Negative feedback regulation of the ERK1/2 MAPK pathway. *Cellular*  
638 *and Molecular Life Sciences* **73**: 4397–4413
- 639 Li H (2013) Aligning sequence reads, clone sequences and assembly contigs with BWA-MEM. *arXiv.org*
- 640 Liao Y, Smyth GK, Shi W (2014) FeatureCounts: An efficient general purpose program for assigning sequence  
641 reads to genomic features. *Bioinformatics* **30**: 923–930
- 642 Maris JM, Hogarty MD, Bagatell R, Cohn SL (2007) Neuroblastoma. *Lancet* **369**: 2106–2120
- 643 Niederdorfer B, Touré V, Vazquez M, Thommesen L, Kuiper M, Lægreid A, Flobak Å (2020) Strategies to  
644 Enhance Logic Modeling-Based Cell Line-Specific Drug Synergy Prediction. *Frontiers in Physiology* **11**:  
645 862
- 646 Oates CJ, Hennessy BT, Lu Y, Mills GB, Mukherjee S (2012) Network inference using steady-state data  
647 and goldbeter-koshland kinetics. *Bioinformatics* **28**: 2342–2348
- 648 Peifer M, Hertwig F, Roels F, Dreidax D, Gartlgruber M, Menon R, Krämer A, Roncaioli JL, Sand F,  
649 Heuckmann JM, Ikram F, Schmidt R, Ackermann S, Engesser A, Kahlert Y, Vogel W, Altmüller J, Nürn-  
650 berg P, Thierry-Mieg J, Thierry-Mieg D, *et al* (2015) Telomerase activation by genomic rearrangements  
651 in high-risk neuroblastoma. *Nature* **526**: 700–704
- 652 Prahallad A, Sun C, Huang S, Di Nicolantonio F, Salazar R, Zecchin D, Beijersbergen RL, Bardelli A,  
653 Bernards R (2012) Unresponsiveness of colon cancer to BRAF(V600E) inhibition through feedback acti-  
654 vation of EGFR. *Nature* **483**: 100–104
- 655 Pugh TJ, Morozova O, Attiyeh EF, Asgharzadeh S, Wei JS, Auclair D, Carter SL, Cibulskis K, Hanna  
656 M, Kiezun A, Kim J, Lawrence MS, Lichtenstein L, McKenna A, Peadarallu CS, Ramos AH, Shefler E,  
657 Sivachenko A, Sougnez C, Stewart C, *et al* (2013) The genetic landscape of high-risk neuroblastoma.  
658 *Nature Genetics* **45**: 279–284
- 659 Robin T, Capes-Davis A, Bairoch A (2019) CLASTR: The Cellosaurus STR similarity search tool - A precious  
660 help for cell line authentication. *International Journal of Cancer* : ijc.32639
- 661 Rozengurt E, Soares HP, Sinnet-Smith J (2014) Suppression of feedback loops mediated by pi3k/mtor induces  
662 multiple overactivation of compensatory pathways: An unintended consequence leading to drug resistance.  
663 *Molecular Cancer Therapeutics* **13**: 2477–2488
- 664 Saez-Rodriguez J, Blüthgen N (2020) Personalized signaling models for personalized treatments. *Molecular*  
665 *Systems Biology* **16**
- 666 Santra T, Kolch W, Kholodenko BN (2013) Integrating Bayesian variable selection with Modular Response  
667 Analysis to infer biochemical network topology. *BMC systems biology* **7**: 57

- 668 Shahbazian D, Roux P, Mieulet V, Cohen MS, B R, J T, W HJ, J B, M P, N S (2006) The mTOR/PI3K and  
669 MAPK pathways converge on eIF4B to control its phosphorylation and activity. *EMBO J* **25**: 2781–91
- 670 Sturm OE, Orton R, Grindlay J, Birtwistle M, Vyshemirsky V, Gilbert D, Calder M, Pitt A, Kholodenko  
671 B, Kolch W (2010) The mammalian MAPK/ERK pathway exhibits properties of a negative feedback  
672 amplifier. *Science Signaling* **3**
- 673 Sung WW, Lin YM, Wu PR, Yen HH, Lai HW, Su TC, Huang RH, Wen CK, Chen CY, Chen CJ, Yeh  
674 KT (2014) High nuclear/cytoplasmic ratio of cdk1 expression predicts poor prognosis in colorectal cancer  
675 patients. *BMC Cancer* **14**: 951
- 676 Talevich E, Shain AH, Botton T, Bastian BC (2016) CNVkit: Genome-Wide Copy Number Detection and  
677 Visualization from Targeted DNA Sequencing. *PLOS Computational Biology* **12**: e1004873
- 678 Terfve CD, Wilkes EH, Casado P, Cutillas PR, Saez-Rodriguez J (2015) Large-scale models of signal prop-  
679 agation in human cells derived from discovery phosphoproteomic data. *Nature Communications* **6**: 1–11
- 680 Woodfield SE, Zhang L, Scorsone KA, Liu Y, Zage PE (2016) Binimetinib inhibits MEK and is effective  
681 against neuroblastoma tumor cells with low NF1 expression. *BMC cancer* **16**: 172
- 682 Yan L (2009) MK-2206: A potent oral allosteric AKT inhibitor. *Cancer Research* **69**: DDT01–1
- 683 Yang HW, Shin MG, Lee S, Kim JR, Park WS, Cho KH, Meyer T, Do Heo W (2012) Cooperative Activation  
684 of PI3K by Ras and Rho Family Small GTPases. *Molecular Cell* **47**: 281–290
